# Supplementary material
Source: HighWire-hosted journal article supplement (http://ejhp.bmj.com/highwire/filestream/149370/field_highwire_adjunct_files/0/ejhpharm-2020-002520supp001_data_supplement.pdf)
Supplement: ejhpharm-2020-002520supp001_data_supplement.pdf [file ejhpharm-2020-002520supp001_data_supplement.pdf]

**Appendix 1****SEARCH STRATEGY***MEDLINE & Cochrane Library*

(Pharmaceutical Services) OR (Pharmacists) OR (Pharmacy Service, Hospital)

AND

(Adolescent) OR (Child) OR (Infant) OR (Pediatrics)

AND

(Attitude) OR (“Attitude of Health Personnel”)

*EMBASE, CINAHL, Web of Science (Core Collection) & Scopus*

(exp clinical pharmac\*/ ) OR OR (exp hospital pharmac\*/ )

AND

(exp adolescent\*/ ) OR (exp child\*/ ) OR (exp infant\*/ ) OR (exp p\$ediatric\*/ )

AND

(exp attitude\*/ ) OR (exp belief\*/ ) OR (exp experience\*/ ) OR (exp opinion\*/ ) OR (exp satisfaction\*/ )
